# Supplementary material
Source: PubMed Central journal article supplement (PMC3394665)

Abductor  
pollicis  
longus

Adductor  
longus

Standard  
cocktail

Adductor  
magnus

Anconeus

Standard  
cocktail

○ Human soleus

○ Rat cardiac

\*

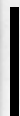

Supplement: supp_215.15.2551_JEB069385Fig1.pdf [file supp_215.15.2551_JEB069385Fig1.pdf]
