# Supplementary material
Source: PubMed Central journal article supplement (PMC3394665)
Supplement: supp_215.15.2551_JEB069385tableS1-S4.pdf [file supp_215.15.2551_JEB069385tableS1-S4.pdf]

Table S1

| Muscle Name                    | Anatomic Region | Function         | Antigravity vs Non-antigravity | Joint Crossings | Titin (kDa)   | Collagen ( $\mu\text{g}/\text{mg}$ muscle) | %MHC-1          | %MHC-2A        | %MHC-2X        |
|--------------------------------|-----------------|------------------|--------------------------------|-----------------|---------------|--------------------------------------------|-----------------|----------------|----------------|
| Abductor digiti minimi         | Hand            | Abductor         | Anti-Gravity                   | Single          | 3757 $\pm$ 16 | 17.8 $\pm$ 2.3                             | 61.2 $\pm$ 10.6 | 31.7 $\pm$ 8.3 | 7.1 $\pm$ 4.5  |
| Abductor pollicis brevis       | Hand            | Abductor         | Anti-Gravity                   | Single          | 3768 $\pm$ 16 | 22.8 $\pm$ 2.1                             | 69 $\pm$ 8      | 19.9 $\pm$ 6.7 | 11.1 $\pm$ 5.5 |
| Abductor pollicis longus       | Antebrachium    | Abductor         | Anti-Gravity                   | Single          | 3763 $\pm$ 22 | 17.9 $\pm$ 5                               | 56.4 $\pm$ 6.9  | 27.7 $\pm$ 5.3 | 15.9 $\pm$ 6.2 |
| Adductor brevis                | Thigh           | Adductor         | Non                            | Single          | 3626 $\pm$ 17 | 7.4 $\pm$ 0.7                              | 69.4 $\pm$ 6.5  | 16.5 $\pm$ 2.4 | 14.1 $\pm$ 4.3 |
| Adductor longus                | Thigh           | Adductor         | Non                            | Single          | 3631 $\pm$ 21 | 7.4 $\pm$ 1.4                              | 61.7 $\pm$ 6.8  | 18.7 $\pm$ 3.4 | 19.6 $\pm$ 5   |
| Adductor magnus                | Thigh           | Adductor         | Non                            | Single          | 3640 $\pm$ 21 | 8.1 $\pm$ 1.7                              | 76.1 $\pm$ 5.5  | 10.5 $\pm$ 2.2 | 13.4 $\pm$ 4   |
| Adductor pollicis              | Hand            | Adductor         | Non                            | Single          | 3708 $\pm$ 12 | 16 $\pm$ 4.7                               | 77.3 $\pm$ 7.4  | 17.9 $\pm$ 5.4 | 4.8 $\pm$ 3.3  |
| Anconeus                       | Antebrachium    | Extensor         | Anti-Gravity                   | Single          | 3691 $\pm$ 18 | 17.9 $\pm$ 1.9                             | 62.8 $\pm$ 7.3  | 29.6 $\pm$ 7   | 7.7 $\pm$ 3.8  |
| Biceps brachii (long)          | Brachium        | Flexor           | Non                            | Multi           | 3679 $\pm$ 18 | 13.2 $\pm$ 3.2                             | 55 $\pm$ 8.1    | 25.3 $\pm$ 6.1 | 19.7 $\pm$ 5.4 |
| Biceps brachii (short)         | Brachium        | Flexor           | Non                            | Multi           | 3649 $\pm$ 25 | 10 $\pm$ 2.6                               | 56.1 $\pm$ 9.5  | 25.7 $\pm$ 5.5 | 18.2 $\pm$ 5   |
| Biceps femoris (long)          | Thigh           | Extensor         | Anti-Gravity                   | Multi           | 3709 $\pm$ 13 | 12.7 $\pm$ 3.1                             | 83 $\pm$ 8.3    | 6 $\pm$ 3.4    | 11 $\pm$ 5.6   |
| Biceps femoris (short)         | Thigh           | Flexor           | Non                            | Single          | 3663 $\pm$ 14 | 9.6 $\pm$ 1.7                              | 68.7 $\pm$ 10.1 | 17.2 $\pm$ 5.6 | 14.1 $\pm$ 4.7 |
| Brachialis                     | Brachium        | Flexor           | Non                            | Single          | 3693 $\pm$ 34 | 11.7 $\pm$ 1.4                             | 65.9 $\pm$ 7.3  | 20.1 $\pm$ 4.2 | 13.9 $\pm$ 3.6 |
| Brachioradialis                | Antebrachium    | Flexor           | Non                            | Single          | 3656 $\pm$ 18 | 15.4 $\pm$ 3.8                             | 45.5 $\pm$ 6.4  | 32 $\pm$ 3.8   | 22.5 $\pm$ 4.6 |
| Coracobrachialis               | Brachium        | Flexor           | Non                            | Single          | 3690 $\pm$ 16 | 12.1 $\pm$ 1.7                             | 49.8 $\pm$ 7.6  | 31.5 $\pm$ 4.4 | 18.8 $\pm$ 3.9 |
| Deltoid                        | Shoulder        | Abductor         | Anti-Gravity                   | Single          | 3677 $\pm$ 22 | 12.9 $\pm$ 1.6                             | 64.3 $\pm$ 7.2  | 20.8 $\pm$ 4.6 | 14.9 $\pm$ 3.8 |
| Extensor carpi radialis brevis | Antebrachium    | Extensor         | Anti-Gravity                   | Multi           | 3709 $\pm$ 26 | 10.9 $\pm$ 2.9                             | 56.4 $\pm$ 5.1  | 29.7 $\pm$ 3.5 | 13.9 $\pm$ 3   |
| Extensor carpi radialis longus | Antebrachium    | Extensor         | Anti-Gravity                   | Multi           | 3718 $\pm$ 15 | 11.2 $\pm$ 2.2                             | 56.6 $\pm$ 5.9  | 31.3 $\pm$ 3.2 | 12.1 $\pm$ 3.9 |
| Extensor carpi ulnaris         | Antebrachium    | Extensor         | Anti-Gravity                   | Multi           | 3749 $\pm$ 16 | 15.1 $\pm$ 2.9                             | 55.4 $\pm$ 7.9  | 31.2 $\pm$ 6.7 | 13.3 $\pm$ 3.7 |
| Extensor digiti quinti         | Antebrachium    | Extensor         | Anti-Gravity                   | Multi           | 3759 $\pm$ 16 | 16.5 $\pm$ 3.2                             | 54.9 $\pm$ 5.3  | 30.1 $\pm$ 4.1 | 15 $\pm$ 3.6   |
| Extensor digitorum comunis     | Antebrachium    | Extensor         | Anti-Gravity                   | Multi           | 3789 $\pm$ 13 | 14.4 $\pm$ 3.5                             | 78.2 $\pm$ 6.3  | 18.3 $\pm$ 4.6 | 3.4 $\pm$ 3.4  |
| Extensor digitorum longus      | Leg             | Extensor         | Anti-Gravity                   | Multi           | 3719 $\pm$ 32 | 11.4 $\pm$ 1.5                             | 54.9 $\pm$ 6.7  | 32.7 $\pm$ 3.1 | 12.3 $\pm$ 5.3 |
| Extensor hallucis longus       | Leg             | Extensor         | Non                            | Multi           | 3702 $\pm$ 15 | 12.9 $\pm$ 1.6                             | 83 $\pm$ 5.4    | 15 $\pm$ 4.7   | 2 $\pm$ 2      |
| Extensor indicis proprius      | Antebrachium    | Extensor         | Anti-Gravity                   | Multi           | 3750 $\pm$ 26 | 11.4 $\pm$ 1.7                             | 57.7 $\pm$ 6.1  | 32.2 $\pm$ 4.4 | 10.1 $\pm$ 4   |
| Extensor pollicis brevis       | Antebrachium    | Extensor         | Anti-Gravity                   | Multi           | 3747 $\pm$ 23 | 13.3 $\pm$ 2.2                             | 57.8 $\pm$ 6.9  | 30.4 $\pm$ 5.6 | 11.8 $\pm$ 5.4 |
| Extensor pollicis longus       | Antebrachium    | Extensor         | Anti-Gravity                   | Multi           | 3733 $\pm$ 10 | 12.2 $\pm$ 2.1                             | 50.4 $\pm$ 6.7  | 38.3 $\pm$ 5   | 11.3 $\pm$ 4.4 |
| Fibularis brevis               | Leg             | Extensor         | Anti-Gravity                   | Multi           | 3720 $\pm$ 14 | 16 $\pm$ 1.5                               | 61.9 $\pm$ 3    | 27.9 $\pm$ 2.5 | 10.2 $\pm$ 3.8 |
| Fibularis longus               | Leg             | Extensor         | Anti-Gravity                   | Multi           | 3716 $\pm$ 33 | 15.5 $\pm$ 1.5                             | 55.6 $\pm$ 7.5  | 23.7 $\pm$ 3.1 | 20.7 $\pm$ 5.8 |
| Flexor carpi radialis          | Antebrachium    | Flexor           | Non                            | Multi           | 3709 $\pm$ 13 | 11.9 $\pm$ 3                               | 45 $\pm$ 6.1    | 31 $\pm$ 4.3   | 24 $\pm$ 3.3   |
| Flexor carpi ulnaris           | Antebrachium    | Flexor           | Non                            | Multi           | 3730 $\pm$ 34 | 14 $\pm$ 3.1                               | 50.9 $\pm$ 8.7  | 29.1 $\pm$ 3.9 | 20 $\pm$ 5.3   |
| Flexor digiti minimi brevis    | Hand            | Flexor           | Non                            | Single          | 3747 $\pm$ 23 | 16.7 $\pm$ 3                               | 68.2 $\pm$ 9    | 23.5 $\pm$ 6   | 8.3 $\pm$ 4.7  |
| Flexor digitorum longus        | Leg             | Flexor           | Non                            | Multi           | 3716 $\pm$ 27 | 11.8 $\pm$ 2.5                             | 54.6 $\pm$ 7.8  | 23.3 $\pm$ 3.1 | 22.1 $\pm$ 5.5 |
| Flexor digitorum profundus     | Antebrachium    | Flexor           | Non                            | Multi           | 3748 $\pm$ 19 | 11.2 $\pm$ 2.5                             | 35.5 $\pm$ 4.8  | 37.2 $\pm$ 2.9 | 27.3 $\pm$ 4.1 |
| Flexor digitorum superficialis | Antebrachium    | Flexor           | Non                            | Multi           | 3726 $\pm$ 16 | 12.4 $\pm$ 2.9                             | 46.3 $\pm$ 5.5  | 29.3 $\pm$ 3.4 | 24.5 $\pm$ 5.6 |
| Flexor hallucis longus         | Leg             | Flexor           | Anti-Gravity                   | Multi           | 3726 $\pm$ 16 | 12.7 $\pm$ 1.9                             | 54.3 $\pm$ 5.7  | 22.9 $\pm$ 3.3 | 22.8 $\pm$ 3.1 |
| Flexor pollicis brevis         | Hand            | Flexor           | Non                            | Single          | 3775 $\pm$ 19 | 15.1 $\pm$ 0.8                             | 76.7 $\pm$ 5.8  | 17.3 $\pm$ 4.3 | 6 $\pm$ 2.8    |
| Flexor pollicis longus         | Antebrachium    | Flexor           | Non                            | Multi           | 3773 $\pm$ 15 | 10 $\pm$ 2.3                               | 44.1 $\pm$ 3.6  | 34.8 $\pm$ 2.2 | 21.1 $\pm$ 3.6 |
| Gastroc (lateral head)         | Leg             | Extensor         | Anti-Gravity                   | Multi           | 3700 $\pm$ 15 | 16 $\pm$ 3.7                               | 65.4 $\pm$ 12   | 15 $\pm$ 4.2   | 19.6 $\pm$ 8.2 |
| Gastroc (medial head)          | Leg             | Extensor         | Anti-Gravity                   | Multi           | 3663 $\pm$ 21 | 13.4 $\pm$ 2.1                             | 57.9 $\pm$ 6.5  | 16.9 $\pm$ 1.1 | 25.1 $\pm$ 6.1 |
| Gemellus – Inferior            | Pelvic/Gluteal  | External Rotator | Anti-Gravity                   | Single          | 3604 $\pm$ 11 | 12.9 $\pm$ 1.7                             | 74.5 $\pm$ 6.3  | 19.2 $\pm$ 4.8 | 5.2 $\pm$ 3.3  |
| Gemellus – Superior            | Pelvic/Gluteal  | External Rotator | Anti-Gravity                   | Single          | 3638 $\pm$ 37 | 12.9 $\pm$ 2                               | 78.9 $\pm$ 7.3  | 14.6 $\pm$ 4.7 | 6.5 $\pm$ 3.1  |
| Gluteus maximus                | Pelvic/Gluteal  | Extensor         | Anti-Gravity                   | Single          | 3648 $\pm$ 18 | 12.8 $\pm$ 1.6                             | 75.2 $\pm$ 6.6  | 14.5 $\pm$ 3.3 | 10.3 $\pm$ 3.8 |
| Gluteus medius                 | Pelvic/Gluteal  | Abductor         | Anti-Gravity                   | Single          | 3659 $\pm$ 27 | 9.3 $\pm$ 1.2                              | 86 $\pm$ 6.8    | 6.1 $\pm$ 2.8  | 7.9 $\pm$ 4.2  |
| Gracilis                       | Thigh           | Adductor         | Non                            | Multi           | 3620 $\pm$ 14 | 12 $\pm$ 2                                 | 65.5 $\pm$ 8.5  | 19 $\pm$ 4.9   | 15.6 $\pm$ 4.2 |
| Iliacus                        | Pelvic/Gluteal  | Flexor           | Non                            | Single          | 3616 $\pm$ 27 | 5 $\pm$ 0.6                                | 76.7 $\pm$ 5.6  | 14.7 $\pm$ 2.9 | 8.5 $\pm$ 2.9  |
| Iliocostalis lumborum          | Axial           | Extensor         | Anti-Gravity                   | Multi           | 3649 $\pm$ 55 | 10 $\pm$ 2                                 | 89.5 $\pm$ 4.9  | 6.1 $\pm$ 2.8  | 4.4 $\pm$ 2.1  |
| Infraspinatus                  | Shoulder        | External Rotator | Anti-Gravity                   | Single          | 3724 $\pm$ 33 | 9.3 $\pm$ 2.6                              | 61.5 $\pm$ 6    | 19.2 $\pm$ 2.5 | 19.3 $\pm$ 4   |
| Interosseus – Dorsal (1st)     | Hand            | Abductor         | Non                            | Single          | 3745 $\pm$ 9  | 13.2 $\pm$ 2.3                             | 67.6 $\pm$ 7.9  | 21.5 $\pm$ 5.5 | 10.9 $\pm$ 3   |
| Interosseus – Dorsal (4th)     | Hand            | Abductor         | Non                            | Single          | 3784 $\pm$ 13 | 14.7 $\pm$ 1.6                             | 55.4 $\pm$ 9.9  | 27.8 $\pm$ 5.7 | 16.9 $\pm$ 5.2 |
| Interosseus – Palmar (1st)     | Hand            | Adductor         | Non                            | Single          | 3753 $\pm$ 23 | 16.3 $\pm$ 3.2                             | 60.6 $\pm$ 8.1  | 26.1 $\pm$ 5.6 | 13.3 $\pm$ 3.3 |
| Interosseus – Palmar (3rd)     | Hand            | Adductor         | Non                            | Single          | 3743 $\pm$ 9  | 20 $\pm$ 4.8                               | 46.9 $\pm$ 11.9 | 34.8 $\pm$ 7.6 | 18.4 $\pm$ 5   |
| Latissimus dorsi               | Shoulder        | Adductor         | Non                            | Multi           | 3765 $\pm$ 64 | 27.7 $\pm$ 4.8                             | 48.6 $\pm$ 9.4  | 29.6 $\pm$ 5.2 | 21.8 $\pm$ 4.8 |
| Longissimus                    | Axial           | Extensor         | Anti-Gravity                   | Multi           | 3621 $\pm$ 15 | 11.9 $\pm$ 1.3                             | 85.7 $\pm$ 7    | 9 $\pm$ 3.8    | 5.3 $\pm$ 3.3  |
| Lumbrical (1st)                | Hand            | Flexor           | Non                            | Multi           | 3737 $\pm$ 31 | 22.2 $\pm$ 3.4                             | 82.7 $\pm$ 4.6  | 14.8 $\pm$ 4.5 | 2.5 $\pm$ 1.1  |
| Lumbrical (4th)                | Hand            | Flexor           | Non                            | Multi           | 3770 $\pm$ 19 | 21 $\pm$ 2.6                               | 86.3 $\pm$ 6.1  | 11.7 $\pm$ 4.4 | 2 $\pm$ 2      |
| Multifidus                     | Axial           | Extensor         | Anti-Gravity                   | Multi           | 3588 $\pm$ 30 | 16.4 $\pm$ 2.6                             | 94.1 $\pm$ 2.7  | 3.1 $\pm$ 1.5  | 2.8 $\pm$ 1.3  |
| Oblique – External             | Axial           | Flexor           | Non                            | Multi           | 3729 $\pm$ 34 | 14.3 $\pm$ 2.6                             | 64.5 $\pm$ 6.6  | 22.9 $\pm$ 3.8 | 12.6 $\pm$ 4.2 |
| Oblique – Internal             | Axial           | Flexor           | Non                            | Multi           | 3635 $\pm$ 23 | 12.2 $\pm$ 2.4                             | 64.9 $\pm$ 4.7  | 24.7 $\pm$ 5.2 | 10.4 $\pm$ 3.7 |
| Obturator externus             | Pelvic/Gluteal  | External Rotator | Anti-Gravity                   | Single          | 3632 $\pm$ 16 | 8.1 $\pm$ 0.6                              | 68.9 $\pm$ 6.6  | 20.7 $\pm$ 5.1 | 10.4 $\pm$ 4.1 |
| Obturator internus             | Pelvic/Gluteal  | External Rotator | Anti-Gravity                   | Single          | 3629 $\pm$ 27 | 8.3 $\pm$ 1.4                              | 67.3 $\pm$ 7.3  | 19.2 $\pm$ 4   | 13.5 $\pm$ 4.2 |
| Opponens digiti minimi         | Hand            | Internal Rotator | Non                            | Single          | 3728 $\pm$ 19 | 14 $\pm$ 2.9                               | 82.9 $\pm$ 3.8  | 13.6 $\pm$ 3.3 | 3.4 $\pm$ 2.3  |

|                        |                |                  |              |        |         |          |           |          |          |
|------------------------|----------------|------------------|--------------|--------|---------|----------|-----------|----------|----------|
| Opponens pollicis      | Hand           | Internal Rotator | Non          | Single | 3735±4  | 15.8±2.4 | 74.7±8.2  | 19.9±5.7 | 5.4±4.1  |
| Palmaris longus        | Antebrachium   | Flexor           | Non          | Multi  | 3702±15 | 12.2±2.6 | 70.1±7.1  | 20±4.1   | 10±3.3   |
| Pectineus              | Thigh          | Adductor         | Non          | Single | 3628±11 | 6.3±0.8  | 63.2±9.9  | 19.8±5.2 | 17±4.7   |
| Pectoralis major       | Shoulder       | Adductor         | Non          | Multi  | 3667±11 | 14.4±3.1 | 54.4±9.3  | 26.2±5.5 | 19.3±4.1 |
| Pectoralis minor       | Shoulder       | Adductor         | Non          | Single | 3659±19 | 11±2.3   | 76.7±5.9  | 18.4±4.7 | 4.8±2.8  |
| Piriformis             | Pelvic/Gluteal | External Rotator | Anti-Gravity | Single | 3617±18 | 8.7±1.7  | 84.3±5.2  | 11.6±4.7 | 4.1±1.9  |
| Plantaris              | Leg            | Extensor         | Anti-Gravity | Multi  | 3676±20 | 13.8±3   | 77±6.8    | 12±3.7   | 11±3.3   |
| Popliteus              | Leg            | Flexor           | Non          | Single | 3701±23 | 16.2±4.2 | 89.1±5.2  | 7±3.2    | 3.9±2    |
| Pronator quadratus     | Antebrachium   | Internal Rotator | Non          | Single | 3798±21 | 8.2±1.2  | 64.6±8    | 23.8±4.2 | 11.5±4.2 |
| Pronator teres         | Antebrachium   | Internal Rotator | Non          | Single | 3712±9  | 10.6±2   | 50.5±8.7  | 26.4±4.5 | 23.2±4.8 |
| Psoas                  | Pelvic/Gluteal | Flexor           | Non          | Multi  | 3629±8  | 6.6±0.8  | 64.2±7    | 20.7±3.6 | 15±4     |
| Quadratus femoris      | Pelvic/Gluteal | External Rotator | Anti-Gravity | Single | 3631±7  | 10.7±1   | 92.5±4.2  | 6.6±3.5  | 0.9±0.9  |
| Quadratus lumborum     | Axial          | Extensor         | Anti-Gravity | Multi  | 3631±15 | 10±1.8   | 82.4±9.1  | 8.8±3.8  | 8.8±5.7  |
| Rectus abdominus       | Axial          | Flexor           | Non          | Multi  | 3660±20 | 10.9±2.4 | 49.9±4.9  | 35.7±3.5 | 14.4±3.2 |
| Rectus femoris         | Thigh          | Flexor           | Non          | Multi  | 3668±16 | 15.5±4.1 | 49.7±10.2 | 26.9±5.1 | 23.4±5.4 |
| Rhomboid major         | Shoulder       | Adductor         | Anti-Gravity | Single | 3645±12 | 14.5±1.4 | 65.1±7.6  | 23.3±5.7 | 11.6±3.4 |
| Rhomboid minor         | Shoulder       | Adductor         | Anti-Gravity | Single | 3655±15 | 14.4±3.2 | 68±7.1    | 19.3±4.3 | 12.7±3.8 |
| Sartorius              | Thigh          | Flexor           | Non          | Multi  | 3597±12 | 11.5±1.7 | 67.4±6.8  | 19.3±4.4 | 13.3±2.8 |
| Semimembranosus        | Thigh          | Extensor         | Anti-Gravity | Multi  | 3684±15 | 13.2±2.7 | 78.6±6.9  | 11.6±3.8 | 9.8±3.2  |
| Semitendinosus         | Thigh          | Extensor         | Anti-Gravity | Multi  | 3681±20 | 15.3±3.6 | 60.5±9.3  | 20.2±4.3 | 19.3±5.4 |
| Serratus anterior      | Shoulder       | Abductor         | Non          | Single | 3684±22 | 12.4±2.2 | 64±8      | 22.1±5   | 13.9±3.3 |
| Soleus                 | Leg            | Extensor         | Anti-Gravity | Single | 3713±13 | 12.5±1.3 | 68.1±8.9  | 20.1±5.5 | 11.8±4.3 |
| Spinalis thoracis      | Axial          | Extensor         | Anti-Gravity | Multi  | 3622±19 | 28.4±6.4 | 91.4±7    | 4.9±3.8  | 3.7±3.2  |
| Subscapularis          | Shoulder       | Internal Rotator | Non          | Single | 3655±14 | 9.8±1.4  | 58±7.8    | 22.1±3.5 | 19.9±5.1 |
| Supinator              | Antebrachium   | Internal Rotator | Non          | Single | 3753±24 | 14.4±1.9 | 61.5±3.1  | 30.4±2.9 | 8.1±3.4  |
| Supraspinatus          | Shoulder       | Abductor         | Anti-Gravity | Single | 3683±22 | 10.8±2.9 | 69.2±6.3  | 19.5±3.4 | 11.2±4.3 |
| Tensor fascia lata     | Thigh          | Flexor           | Non          | Multi  | 3607±23 | 9±1.1    | 62.8±8.6  | 21.5±4.7 | 15.7±4.7 |
| Teres major            | Shoulder       | Internal Rotator | Non          | Single | 3641±19 | 16.4±3.7 | 58.4±6.7  | 23.3±3   | 18.3±4.3 |
| Teres minor            | Shoulder       | External Rotator | Anti-Gravity | Single | 3670±13 | 11.8±2   | 61.6±9.4  | 21.5±3.5 | 17±6.7   |
| Tibialis anterior      | Leg            | Extensor         | Non          | Single | 3665±7  | 10.7±1.2 | 79.4±4.8  | 15.4±3.4 | 5.1±2.5  |
| Tibialis posterior     | Leg            | Flexor           | Anti-Gravity | Single | 3691±15 | 9.2±2.2  | 80±9.7    | 10.2±3.8 | 9.8±6.7  |
| Transverse abdominus   | Axial          | Flexor           | Non          | Multi  | 3700±24 | 14.8±2.9 | 64.6±7.3  | 22.1±4   | 13.3±4.1 |
| Trapezius              | Shoulder       | Extensor         | Anti-Gravity | Multi  | 3704±17 | 15.7±2.7 | 72.1±6.2  | 22.3±5   | 5.6±2.9  |
| Triceps (lateral head) | Brachium       | Extensor         | Anti-Gravity | Single | 3691±16 | 12±2.9   | 45.4±10.5 | 32.3±6.2 | 22.3±5.5 |
| Triceps (long head)    | Brachium       | Extensor         | Anti-Gravity | Multi  | 3712±9  | 11.9±2.7 | 48.1±7.1  | 30±4.5   | 22±5.1   |
| Triceps (medial head)  | Brachium       | Extensor         | Anti-Gravity | Single | 3705±10 | 12.7±2.4 | 42.4±3.6  | 39.6±2.5 | 18±2.7   |
| Vastus intermedius     | Thigh          | Extensor         | Anti-Gravity | Single | 3623±20 | 9.2±1.4  | 63±10     | 25.3±6.5 | 11.7±4.7 |
| Vastus lateralis       | Thigh          | Extensor         | Anti-Gravity | Single | 3662±19 | 13.2±2.2 | 48.3±9.5  | 37.5±7.1 | 14.2±2.9 |
| Vastus medialis        | Thigh          | Extensor         | Anti-Gravity | Single | 3671±20 | 13.3±2.8 | 52.8±9.7  | 33.7±6.6 | 13.5±3.5 |

Table S2. Stepwise DFA of non-antigravity and antigravity muscles

| Step | Variable Entered | Wilks' Lambda | F-statistic |
|------|------------------|---------------|-------------|
| 1    | %MHC-2X          | 0.989         | 6.3         |

Table S3. Stepwise DFA of muscles that cross single and multiple joints

| Step | Variable Entered | Wilks' Lambda | F-statistic |
|------|------------------|---------------|-------------|
| 1    | Collagen Content | 0.992         | 4.5         |
| 2    | %MHC-2X          | 0.978         | 6.4         |

Table S4. Standardized canonical discriminant function coefficients as determined by stepwise DFA

| Grouping Factor: Anatomic Region                        |          | Function |        |        |  |
|---------------------------------------------------------|----------|----------|--------|--------|--|
|                                                         | 1        | 2        | 3      | 4      |  |
| Titin molecular mass                                    | 0.862    | 0.211    | -0.184 | 0.468  |  |
| Collagen                                                | 0.343    | 0.135    | 0.836  | -0.547 |  |
| %MHC-1                                                  | -0.593   | 0.877    | 0.705  | 1.251  |  |
| %MHC-2X                                                 | -0.463   | -0.101   | 1.259  | 1.178  |  |
| Grouping Factor: Muscle Function                        |          |          |        |        |  |
|                                                         | Function |          |        |        |  |
| Titin molecular mass                                    | 1.000    |          |        |        |  |
| Grouping Factor: Antigravity vs Non-antigravity muscles |          |          |        |        |  |
|                                                         | Function |          |        |        |  |
| %MHC-2X                                                 | 1.000    |          |        |        |  |
| Grouping Factor: Joint Crossings                        |          |          |        |        |  |
|                                                         | Function |          |        |        |  |
| Collagen Content                                        | 0.870    |          |        |        |  |
| %MHC-2X                                                 | 0.853    |          |        |        |  |
