# Supplementary material
Source: PubMed Central journal article supplement (PMC3394665)

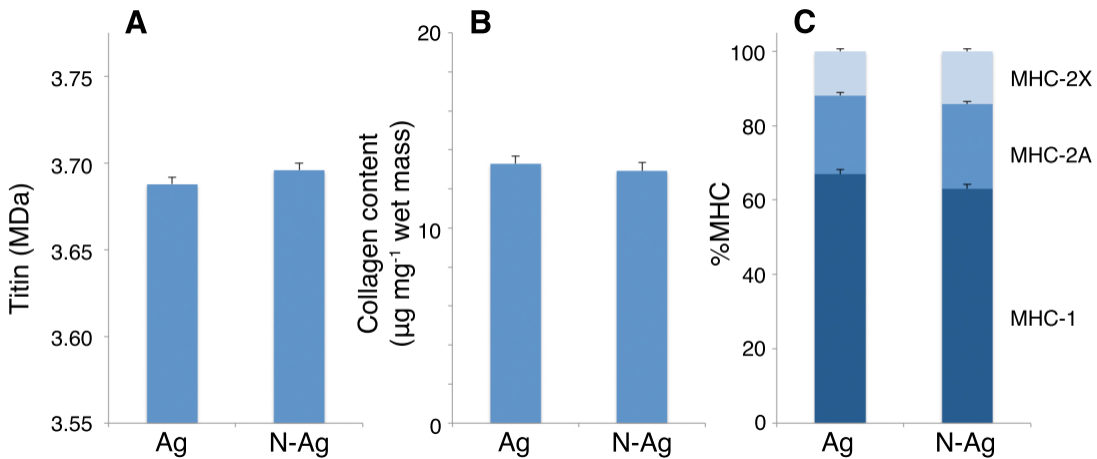

Supplement: supp_215.15.2551_JEB069385Fig2.pdf [file supp_215.15.2551_JEB069385Fig2.pdf]

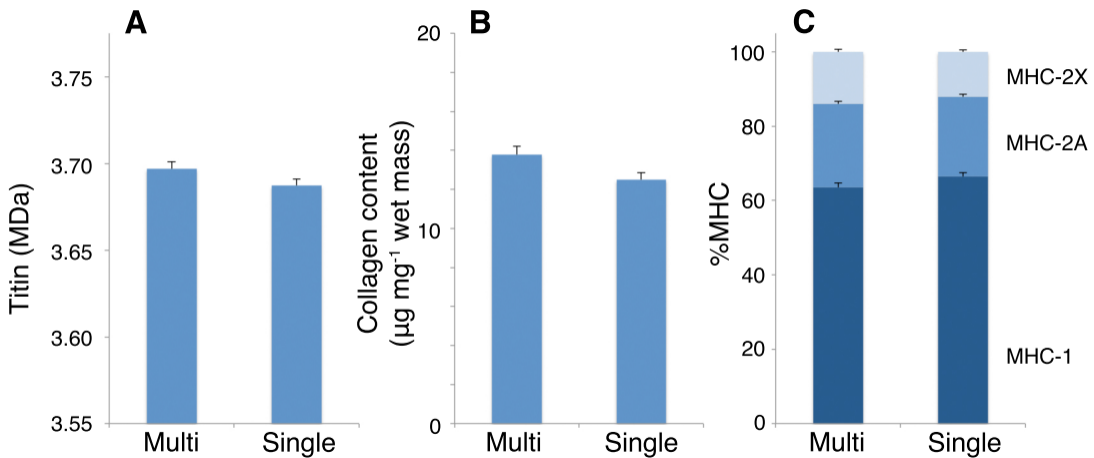

Supplement: supp_215.15.2551_JEB069385Fig3.pdf [file supp_215.15.2551_JEB069385Fig3.pdf]
